# Supplementary material for: Fosfomycin Resistance Evolutionary Pathways of Stenotrophomonas maltophilia in Different Growing Conditions
Source: MDPI journal article supplement (doi:10.3390/ijms23031132), 2022-01-20
Supplement: s1 [file s1]

**Table S1.** Primers used in this study

| Primer            | Sequence (5' - 3')      | Description                                       |
|-------------------|-------------------------|---------------------------------------------------|
| eno_SNP_F         | GCCTCGACCGTCG           | Verification of                                   |
| eno_SNP_R         | CCGACTTCAGCGAATGG       | Leu106Pro in <i>eno</i>                           |
| phaR_SNP_F        | GACACCGAGATCTCCAGCTA    | Verification of Ser85Phe                          |
| phaR_SNP_R        | CCAGATAGTTGCCCCATGAAG   | in <i>phaR</i>                                    |
| bolA_SNP_F        | CGGAAGTAGAATGGAGGCAC    | Verification of Ala52Ala                          |
| bolA_SNP_R        | GTTCACCCAGCAGCTTCAC     | in <i>bolA</i>                                    |
| virB10_ins_F      | TTGGAGACATTTTCCACGTC    | Verification of Asp173fs                          |
| virB10_ins_R      | AGTAGGCCACAAGAAGATCG    | in <i>virB10</i>                                  |
| recR_ins_F        | CCGAGTCGAAGTCGAAGAT     | Verification of                                   |
| recR_ins_R        | TCGATCAATTGTTCAAGCAG    | CAAGCGGGTGCCACAGAA<br>insertion                   |
| gspL_SNP_F        | GTCGTGATGCTGGTACTGG     | Verification of                                   |
| gspL_SNP_R        | GGGTCAGTTCGTTCCAGATT    | Val247Phe in <i>gspL</i>                          |
| ptsN_SNP_F        | GTCGTGATGCTGGTACTGG     | Verification of                                   |
| ptsN_SNP_R        | GGGTCAGTTCGTTCCAGATT    | GlnAlaLeu126ArgProAla in<br><i>ptsN</i>           |
| SMD_RS14605_SNP_F | CTTCGTGTTTCGAGAACGTC    | Verification of                                   |
| SMD_RS14605_SNP_R | AGCTCCTCGATCACTTCCTC    | Thr419Pro in SMD_RS14605                          |
| 27                | TGCCAGCGACAGTGCAAAGGGTC | Amplification of <i>smeT</i> to                   |
| 48                | CCGTGTTTCATGGAAGCAGGC   | test DNA contamination                            |
| gyrA_F            | CGCAAGAGCTACCTCGATTA    | To amplify the                                    |
| gyrA_R            | GGTGGTACTTACCGATGACG    | housekeeping gene <i>gyrA</i><br>by real-time PCR |
| murA_F            | TGTCCAAGCTGGTCGAAG      | To amplify <i>murA</i> by real-                   |
| murA_R            | TCGAAGATCGTTTCGTTGAT    | time PCR                                          |
| bolA_F            | ACACCATCCGCAACCTGAT     | To amplify <i>bolA</i> by real-                   |
| bolA_R            | CAGGGTGGCATAGACCAT      | time PCR                                          |
| virB10_F          | GTCCAAAATGTCTCCAATGC    | To amplify <i>virB10</i> by                       |
| virB10_R          | ATAGATCTTGGAGCCCTTCG    | real-time PCR                                     |
| recR_F            | GAACAATTGATCGACGCACT    | To amplify <i>recR</i> by real-                   |
| recR_R            | CTGCTGTTGGCACAGGTC      | time PCR                                          |

| Primer        | Sequence (5' - 3')      | Description                                    |
|---------------|-------------------------|------------------------------------------------|
| gspL_F        | GTCGTGATGCTGGTACTGG     | To amplify <i>gspL</i> by real-time PCR        |
| gspL_R        | CAGTTCGTTCCAGATTTCAA    |                                                |
| SMD_RS14605_F | GGTACGCTGGGCTACTACAC    | To amplify <i>SMD_RS14605</i> by real-time PCR |
| SMD_RS14605_R | TCTGGAAGAACGAGAACAGG    |                                                |
| ptsN_F        | TGCTGGTGGGTGTAGTGG      | To amplify <i>ptsN</i> by real-time PCR        |
| ptsN_R        | GACAGATCTATCTGAACCTGTGC |                                                |
